# Supplementary material for: A Retrospective Database Analysis to Estimate the Burden of Acute Otitis Media in Children Aged <15 Years in the Veneto Region (Italy)
Source: MDPI journal article supplement (doi:10.3390/children9030436), 2022-03-19
Supplement: s1 [file s1]

## **Supplement**

**For the statistical analysis, the following medical conditions were considered to be risk factors for AOM in the study**

Diabetes mellitus, chronic heart disease, chronic lung disease, asthma, chronic liver disease, cochlear implant, cerebrospinal fluid leak, sickle cell disease and other hemoglobinopathies, anatomic or functional asplenia, congenital or acquired immunodeficiency, infection with human immunodeficiency virus, chronic renal failure, nephrotic syndrome, malignant neoplasms, leukemias, lymphomas, Hodgkin's disease, and other diseases associated with treatment with immunosuppressive drugs or radiation therapy, solid organ transplantation, or multiple myeloma.

**We thank the following physicians for their contribution of data through participation in Pedianet:**

Angelo Alongi, Roberta Angelini, Giovanni Avarello, Lucia Azzoni, Maria Carolina Barbazza, Maria Barberi Frandanisa, Patrizia Barbieri, Gabriele Belluzzi, Eleonora Benetti, Roberto Bezzi, Franca Boe, Stefano Bollettini, Andrea Bruna, Ivana Brusaterra, Roberto Budassi, Massimo Caccini, Laura Cantalupi, Luigia Caprio, Massimo Castaldo, Stefano Castelli, Serenella Castronuovo, Monica Cavedagni, Stefania Censini, Giuseppe Egidio Cera, Carla Ciscato, Mariangela Clerici Schoeller, Giuseppe Collacciani, Fabrizio Comaita, Ugo Alfredo Conte, Nicola Costanzo, Sandra Cozzani, Giancarlo Cuboni, Vito Francesco D'Amanti, Rita De Angelis, Roberto De Clara, Annamaria De Marchi, Emanuele De Nicolò, Gian Piero Del Bono, Gigliola Del Ponte, Tiziana Di Giampietro, Giuseppe Di Mauro, Giuseppe Di Santo, Piero Di Saverio, Marco Dolci, Mattia Doria, Stefano Drago, Pietro Falco, Mario Fama, Marco Faraci, Tania Favilli, Mariagrazia Federico, Michele Felice, Enrico Ferrara, Marta Ferrarese, Michele Ferretti, Paolo Forcina, Claudio Frattini, Ezio

Frison, Fabrizio Fusco, Giovanni Gallo, Andrea Galvagno, Alberta Gentili, Pierfrancesco Gentilucci, Giuliana Giampaolo, Giuseppe Giancola, Silvia Girotto, Costantino Gobbi, Mauro Grelloni, Mirco Grugnetti, Urania Lagrasta, Massimo Landi, Paola Lasalvia, M. Rosaria Letta, Giuseppe Lietti, Cinzia Lista, Ricciardo Lucantonio, Francesco Luise, Diego Luotti, Nadia Macropodio, Francesca Marine, Lorenzo Mariniello, Gabriele Marostica, Sergio Masotti, Stefano Meneghetti, Massimo Milani, Stella Vittoria Milone, Angela Maria Monteleone, Pierangela Mussinu, Carmen Muzzolini, Flavia Nicoloso, Laura Olimpi, Maria Maddalena Palma, Vittorio Pandolfini, Angela Pasinato, Andrea Passarella, Pasquale Pazzola, Monica Perin, Danilo Perri, Silvana Pescosolido, Giovanni Petrazzuoli, Giuseppe Petrotto, Patrizia Picco, Ambrogina Pirola, Lorena Pisanello, Daniele Pittarello, Eleonora Polidoro, Elena Porro, Adolfo Francesco Porto, Elisabetta Profumo, Antonino Puma, Ferdinando Ragazzon, Paolo Rosas, Rino Rosignoli, Mariagiulia Rosina, Mariella Rossitto, Bruno Ruffato, Lucia Ruggieri, Annamaria Ruscitti, Annarita Russo, Pietro Salamone, Daniela Sambugaro, Luigi Saretta, Vittoria Sarno, Nico Maria Sciolla, Paolo Senesi, Carla Silvan, Valter Spanevello, Francesco Speranza, Maura Sticco, Francesco Storelli, Gianni Tamassia, Paolo Tambaro, Giacomo Toffol, Marco Tondello, Gabriele Tonelli, Angelo Tummarello, Sergio Venditti, Concetta Volpe, Francescopaolo Volpe, Aldo Vozzi.

**Supplementary Table S1. Annual IR of simple AOM in the overall pediatric population 0–14 years of age and by age group**

| <b>Year</b>                        | <b>Simple AOM episodes<br/>(n = 34,739)</b> | <b>Person-years</b> | <b>Annual IR per 1000 person-years<br/>(95% CI)</b> |
|------------------------------------|---------------------------------------------|---------------------|-----------------------------------------------------|
| <b>Overall (0–14 years of age)</b> |                                             |                     |                                                     |
| 2010                               | 4809                                        | 43,692.02           | 110 (107–113)                                       |
| 2011                               | 4957                                        | 47,609.77           | 104 (101–107)                                       |
| 2012                               | 4769                                        | 50,643.46           | 94 (91–97)                                          |
| 2013                               | 4683                                        | 52,192.36           | 90 (87–92)                                          |
| 2014                               | 4191                                        | 52,805.74           | 79 (77–82)                                          |
| 2015                               | 3923                                        | 52,392.12           | 75 (73–77)                                          |
| 2016                               | 3871                                        | 52,184.01           | 74 (72–77)                                          |
| 2017                               | 3536                                        | 51,348.38           | 69 (67–71)                                          |
| <b>&lt;2 years of age</b>          |                                             |                     |                                                     |
| 2010                               | 1177                                        | 8396.77             | 140 (132–148)                                       |
| 2011                               | 1173                                        | 8687.03             | 135 (127–143)                                       |
| 2012                               | 1148                                        | 8475.04             | 135 (128–143)                                       |
| 2013                               | 1096                                        | 7757.59             | 141 (133–150)                                       |
| 2014                               | 1034                                        | 6746.95             | 153 (144–163)                                       |
| 2015                               | 827                                         | 5460.51             | 151 (141–162)                                       |
| 2016                               | 810                                         | 5192.16             | 156 (145–167)                                       |
| 2017                               | 867                                         | 5159.47             | 168 (157–179)                                       |
| <b>2–4 years of age</b>            |                                             |                     |                                                     |
| 2010                               | 2308                                        | 12,338.81           | 187 (179–195)                                       |
| 2011                               | 2361                                        | 12,846.22           | 184 (176–191)                                       |
| 2012                               | 2164                                        | 13,289.06           | 163 (156–170)                                       |
| 2013                               | 2083                                        | 13,436.86           | 155 (148–162)                                       |
| 2014                               | 1929                                        | 13,207.40           | 146 (140–153)                                       |
| 2015                               | 1801                                        | 12,405.18           | 145 (138–152)                                       |

|                          |      |           |               |
|--------------------------|------|-----------|---------------|
| 2016                     | 1768 | 11,145.09 | 159 (151–166) |
| 2017                     | 1462 | 9629.78   | 152 (144–160) |
| <b>5–14 years of age</b> |      |           |               |
| 2010                     | 1324 | 22,956.44 | 58 (55–61)    |
| 2011                     | 1423 | 26,076.52 | 55 (52–57)    |
| 2012                     | 1457 | 28,879.35 | 50 (48–53)    |
| 2013                     | 1504 | 30,997.91 | 49 (46–51)    |
| 2014                     | 1228 | 32,851.39 | 37 (35–39)    |
| 2015                     | 1295 | 34,526.43 | 38 (35–40)    |
| 2016                     | 1293 | 35,846.76 | 36 (34–38)    |
| 2017                     | 1207 | 36,559.13 | 33 (31–35)    |

---

Abbreviations: AOM, acute otitis media; CI, confidence interval; IR, incidence rate.

**Supplementary Table S2. Annual IRs of recurrent AOM in the overall pediatric population 0–14 years of age and by age group**

| <b>Year</b>                        | <b>Recurrent AOM episodes<br/>(n = 6944)</b> | <b>Person-years</b> | <b>Annual IR per 1000 person-years<br/>(95% CI)</b> |
|------------------------------------|----------------------------------------------|---------------------|-----------------------------------------------------|
| <b>Overall (0–14 years of age)</b> |                                              |                     |                                                     |
| 2010                               | 701                                          | 43,692.02           | 16 (15–17)                                          |
| 2011                               | 914                                          | 47,609.77           | 19 (18–20)                                          |
| 2012                               | 1126                                         | 50,643.46           | 22 (21–24)                                          |
| 2013                               | 1011                                         | 52,192.36           | 19 (18–21)                                          |
| 2014                               | 1004                                         | 52,805.74           | 19 (18–20)                                          |
| 2015                               | 860                                          | 52,392.12           | 16 (15–18)                                          |
| 2016                               | 787                                          | 52,184.01           | 15 (14–16)                                          |
| 2017                               | 541                                          | 51,348.38           | 11 (10–11)                                          |
| <b>&lt;2 years of age</b>          |                                              |                     |                                                     |
| 2010                               | 327                                          | 8396.77             | 39 (35–43)                                          |
| 2011                               | 327                                          | 8687.03             | 38 (34–42)                                          |
| 2012                               | 335                                          | 8475.04             | 40 (35–44)                                          |
| 2013                               | 287                                          | 7757.59             | 37 (33–41)                                          |
| 2014                               | 225                                          | 6746.95             | 33 (29–38)                                          |
| 2015                               | 171                                          | 5460.51             | 31 (27–36)                                          |
| 2016                               | 143                                          | 5192.16             | 28 (23–32)                                          |
| 2017                               | 93                                           | 5159.47             | 18 (14–22)                                          |
| <b>2–4 years of age</b>            |                                              |                     |                                                     |
| 2010                               | 317                                          | 12,338.81           | 26 (23–29)                                          |
| 2011                               | 500                                          | 12,846.22           | 39 (36–42)                                          |
| 2012                               | 652                                          | 13,289.06           | 49 (45–53)                                          |
| 2013                               | 558                                          | 13,436.86           | 42 (38–45)                                          |
| 2014                               | 574                                          | 13,207.40           | 43 (40–47)                                          |
| 2015                               | 493                                          | 12,405.18           | 40 (36–43)                                          |

|                          |     |           |            |
|--------------------------|-----|-----------|------------|
| 2016                     | 421 | 11,145.09 | 38 (34–41) |
| 2017                     | 248 | 9629.78   | 26 (23–29) |
| <b>5–14 years of age</b> |     |           |            |
| 2010                     | 57  | 22,956.44 | 2 (2–3)    |
| 2011                     | 87  | 26,076.52 | 3 (3–4)    |
| 2012                     | 139 | 28,879.35 | 5 (4–6)    |
| 2013                     | 166 | 30,997.91 | 5 (5–6)    |
| 2014                     | 205 | 32,851.39 | 6 (5–7)    |
| 2015                     | 196 | 34,526.43 | 6 (5–6)    |
| 2016                     | 223 | 35,846.76 | 6 (5–7)    |
| 2017                     | 200 | 36,559.13 | 5 (5–6)    |

---

Abbreviations: AOM, acute otitis media; CI, confidence interval; IR, incidence rate.

**Supplementary Figure S1. Interrupted time series of mean annual simple AOM incidence in the pediatric population: A) 0–14 years; B) <2 years; C) 2–4 years; and D) 5–14 years of age**

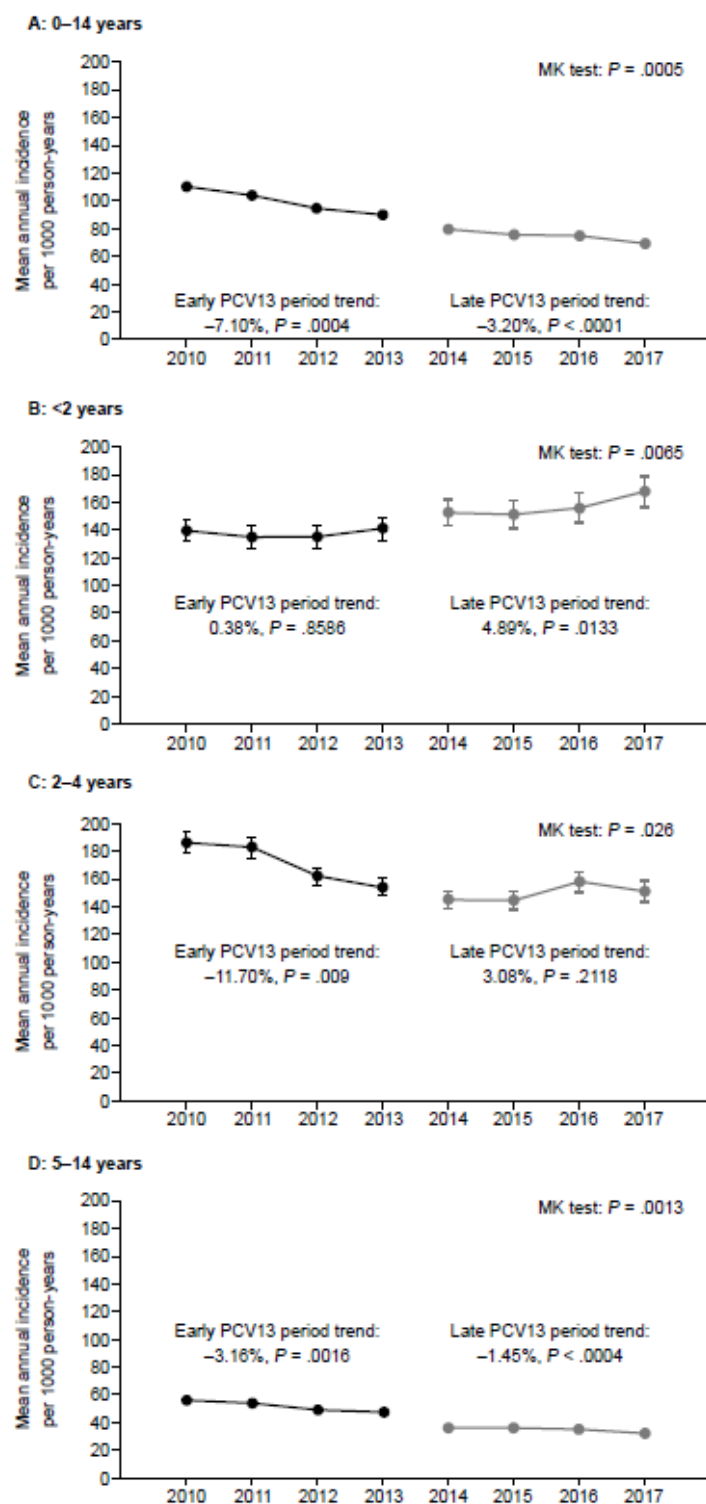

AOM, acute otitis media; MK, Mann–Kendall; PCV13, 13-valent pneumococcal conjugate vaccine.

**Supplementary Figure S2. Interrupted time series of mean annual recurrent AOM incidence in the pediatric population: A) 0–14 years; B) <2 years; C) 2–4 years; and D) 5–14 years of age**

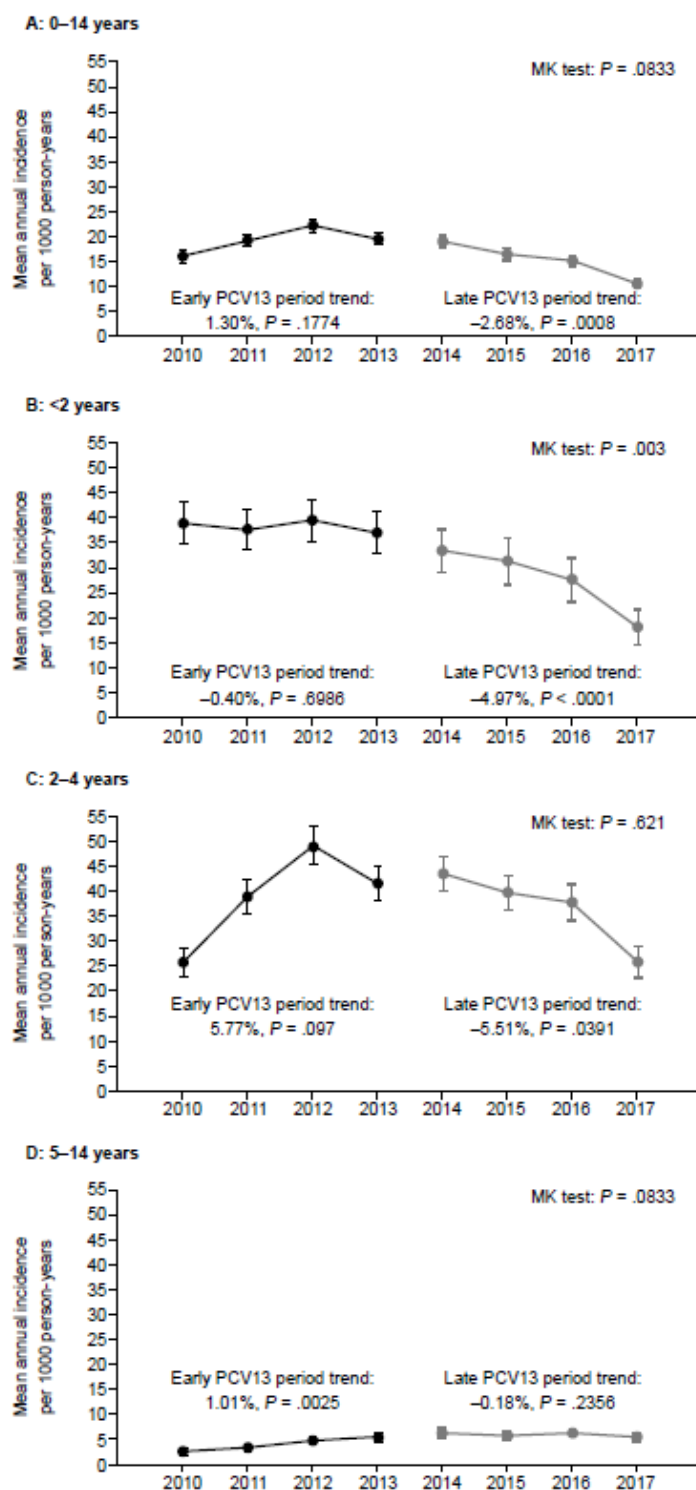

AOM, acute otitis media; MK, Mann–Kendall; PCV13, 13-valent pneumococcal conjugate vaccine.
